# Supplementary material
Source: MDPI journal article supplement (https://www.mdpi.com/2072-4292/9/1/78)
Supplement: s1 [file s1]

Supplementary files may be found on the Zenodo platform at  
<https://doi.org/10.3390/rs9010078>.
